# Supplementary material
Source: Oxford University Press journal article supplement (http://www.oxfordjournals.org/our_journals/semitj/supplement24toc.pdf)
Supplement: Supplementary file 1 [file supplement24toc.pdf]

## Table of Contents

Preface

**Philip Sadgrove**

**Dan D.Y. Shapira**

Karaite Printing in the Ottoman Empire 1

**Dickran Kouymjian**

From Manuscript to Printed Book: Armenian Bookbinding from the Sixteenth to the Nineteenth Century 13

**René Bekius**

Polyglot Amsterdam Printing Presses 1620s–1720s:  
Armenian and Jewish Printers Compared 23

**Carsten-Michael Walbiner**

Some Observations on the Perception and Understanding of Printing  
amongst the Arab Greek Orthodox (Melkites) in the Seventeenth Century 65

**Geoffrey Roper**

Turkish Printing and Publishing in England in the Seventeenth Century 77

**I. Metin Kunt**

Reading Elite, Elite Reading 89

**Frédéric Hitzel**

Ambroise Firmin-Didot, un éditeur parisien témoin des premières  
imprimeries impériales de Constantinople en 1816 101

**Philip Sadgrove**

The European Press in Khedive Ismā'īl's Egypt (1863–66): A Neglected Field 109

**Özgür Türesay**

Contribution à l'histoire de l'édition ottomane: les almanachs  
Ebüzziya (1880–1900) 129

|                                                                                                                                           |     |
|-------------------------------------------------------------------------------------------------------------------------------------------|-----|
| <b>Ami Ayalon</b>                                                                                                                         |     |
| Inscribing the Public Domain: Arabic Placards, Proclamations and Handbills                                                                | 155 |
| <b>Uri M. Kupferschmidt</b>                                                                                                               |     |
| Literacy, Illiteracy and Censorship in the Tradition of the Muslim Brotherhood                                                            | 165 |
| <b>Jacob M. Landau</b>                                                                                                                    |     |
| Attempts at Romanization in the Middle East and Central Asia                                                                              | 185 |
| <b>Cheng-Hsiang Hsu</b>                                                                                                                   |     |
| The Huart Collection at the National Taiwan University                                                                                    | 193 |
| <b>Gavin D. Brockett</b>                                                                                                                  |     |
| Provincial Newspapers, Print Culture and the Framing of the Turkish Nation, 1945–1954                                                     | 207 |
| <b>Huda Smitshuijzen Abi-Farès</b>                                                                                                        |     |
| Arabic Type as Cultural Identity                                                                                                          | 233 |
| <b>Jean-Louis Estève and Nathalie Rodriguez</b>                                                                                           |     |
| L’Impression lithographique du livre: Éléments pour un inventaire des signes et traces spécifiques à l’impression lithographique du livre | 241 |
